# Supplementary material for: Dietary macronutrient composition impacts gene regulation in adipose tissue
Source: Springer Nature journal article supplement (doi:10.1038/s42003-024-05876-5), 2024-02-16
Supplement: MOESM2 [file 42003_2024_5876_MOESM2_ESM.pdf › 42003_2024_5876_MOESM2_ESM.pdf]

## **Description of Additional Supplementary Files**

**File name:** Supplementary Data 1

**Description:** Metabolic and food intake measures.

**File name:** Supplementary Data 2

**Description:** Differential splicing and expression results for all genes in adipose tissue.

**File name:** Supplementary Data 3

**Description:** AIC values and mixture model summaries for all variables.
