# Supplementary material for: Dietary macronutrient composition impacts gene regulation in adipose tissue
Source: Commun Biol. 2024 Feb 16;7:194. doi: 10.1038/s42003-024-05876-5 (PMC10873408; doi:10.1038/s42003-024-05876-5)
Supplement: Supplementary file 5 — Supplementary Data 3 [file 42003_2024_5876_MOESM5_ESM.xlsx]

## Sheet: Sheet1
Supplementary Table 2. AIC values and mixture model summaries for all variables
Variables presented in Figure 1:
Body Weight
Model	AIC
1	328.1
2	320.08
3	300.21
4	293.67
5	302.2
Model 4 favoured by AIC.
Coef.	Estimate	Std. Error	t value	df	p
p_P	21.7821	72.6768	0.2997	50	0.7656
p_C	1.7599	10.8147	0.1627	50	0.8714
p_F	116.028	47.5113	2.4421	50	0.0182
cubic(p_P, p_C)	-139.749	88.2689	-1.5832	50	0.1197
cubic(p_P, p_F)	178.112	166.865	1.0674	50	0.2909
cubic(p_C, p_F)	253.107	115.497	2.1915	50	0.0331
p_P:p_C	-11.4015	133.612	-0.0853	50	0.9323
p_P:p_F	-149.751	141.618	-1.0574	50	0.2954
p_C:p_F	-162.606	94.1839	-1.7265	50	0.0904
p_P:p_C:p_F	603.625	297.577	2.0285	50	0.0479
Fat Mass
Model	AIC
1	294.22
2	285.72
3	270.13
4	264.38
5	271.75
Model 4 favoured by AIC.
Coef.	Estimate	Std. Error	t value	df	p
p_P	-45.262	56.9347	-0.795	50	0.4304
p_C	-15.8209	8.4722	-1.8674	50	0.0677
p_F	96.654	37.2202	2.5968	50	0.0123
cubic(p_P, p_C)	-30.7286	69.1494	-0.4444	50	0.6587
cubic(p_P, p_F)	243.314	130.721	1.8613	50	0.0686
cubic(p_C, p_F)	249.725	90.48	2.76	50	0.0081
p_P:p_C	54.8855	104.671	0.5244	50	0.6023
p_P:p_F	-100.982	110.943	-0.9102	50	0.3671
p_C:p_F	-166.746	73.7833	-2.2599	50	0.0282
p_P:p_C:p_F	505.608	233.12	2.1689	50	0.0349
Lean Mass
Model	AIC
1	243.65
2	228.55
3	220.13
4	219.55
5	221.43
Model 3 favoured by AIC.
Coef.	Estimate	Std. Error	t value	df	p
p_P	7.8925	5.7544	1.3716	54	0.1759
p_C	21.3382	1.7151	12.4413	54	0
p_F	18.945	3.7383	5.0678	54	0
p_P:p_C	36.0829	11.1436	3.238	54	0.0021
p_P:p_F	47.7015	13.3629	3.5697	54	0.0008
p_C:p_F	-0.3467	12.4062	-0.0279	54	0.9778
Glucose Tolerance Test (iAUC)
Model	AIC
1	799.75
2	792.92
3	794.98
4	797.43
5	796.78
Model 2 favoured by AIC.
Coef.	Estimate	Std. Error	t value	df	p
p_P	746.345	123.256	6.0553	57	0
p_C	190.629	74.5838	2.5559	57	0.0133
p_F	291.642	91.9093	3.1732	57	0.0024
Variables presented in Figure 3:
Cluster 1
Model	AIC
1	-66.14
2	-111.49
3	-105.75
4	-102.9
5	-104.76
Model 2 favoured by AIC.
Coef.	Estimate	Std. Error	t value	df	p
p_P	-0.3146	0.0633	-4.9743	54	0
p_C	0.3261	0.0399	8.1655	54	0
p_F	-0.1598	0.048	-3.3271	54	0.0016
Cluster 2
Model	AIC
1	-14.5
2	-78.71
3	-94.08
4	-89.29
5	-92.17
Model 3 favoured by AIC.
Coef.	Estimate	Std. Error	t value	df	p
p_P	-0.8025	0.4034	-1.9893	51	0.052
p_C	-0.3042	0.1272	-2.3925	51	0.0205
p_F	-1.1514	0.2762	-4.169	51	0.0001
p_P:p_C	2.7094	0.7917	3.4222	51	0.0012
p_P:p_F	4.3512	0.9354	4.6516	51	0
p_C:p_F	1.1567	0.9149	1.2643	51	0.2119
Cluster 3
Model	AIC
1	91.26
2	58.22
3	47.31
4	51.63
5	48.83
Model 3 favoured by AIC.
Coef.	Estimate	Std. Error	t value	df	p
p_P	2.6999	1.3944	1.9363	51	0.0584
p_C	0.1877	0.4395	0.427	51	0.6712
p_F	4.4505	0.9547	4.6618	51	0
p_P:p_C	-4.703	2.7366	-1.7185	51	0.0918
p_P:p_F	-12.3047	3.2334	-3.8055	51	0.0004
p_C:p_F	-7.454	3.1624	-2.357	51	0.0223
Cluster 4
Model	AIC
1	97.16
2	61.47
3	51.39
4	55.84
5	52.77
Model 3 favoured by AIC.
Coef.	Estimate	Std. Error	t value	df	p
p_P	2.2093	1.4452	1.5287	51	0.1325
p_C	0.4991	0.4556	1.0955	51	0.2785
p_F	4.5071	0.9895	4.5552	51	0
p_P:p_C	-4.9135	2.8364	-1.7323	51	0.0893
p_P:p_F	-12.4214	3.3512	-3.7065	51	0.0005
p_C:p_F	-7.4316	3.2777	-2.2673	51	0.0276
Cluster 5
Model	AIC
1	58.35
2	5.81
3	-16.89
4	-11.86
5	-15.44
Model 3 favoured by AIC.
Coef.	Estimate	Std. Error	t value	df	p
p_P	-2.3772	0.794	-2.9941	51	0.0042
p_C	-0.1379	0.2503	-0.5511	51	0.584
p_F	-3.313	0.5436	-6.0947	51	0
p_P:p_C	4.7641	1.5583	3.0573	51	0.0036
p_P:p_F	10.0558	1.8411	5.4618	51	0
p_C:p_F	4.7917	1.8007	2.661	51	0.0104
Variables presented in Figure 4:
Vegfa Exon 6
Model	AIC
1	164.75
2	156.98
3	160.53
4	162.71
5	162.22
Model 2 favoured by AIC.
Coef.	Estimate	Std. Error	t value	df	p
p_P	-1.4077	0.6665	-2.1119	54	0.0393
p_C	1.3958	0.4209	3.3166	54	0.0016
p_F	-0.64	0.506	-1.2649	54	0.2113
Igf1 Exon 5
Model	AIC
1	164.75
2	154.86
3	153.41
4	151.04
5	154.54
Model 4 favoured by AIC.
Coef.	Estimate	Std. Error	t value	df	p
p_P	-24.2948	23.8162	-1.0201	47	0.3129
p_C	5.7975	3.7288	1.5548	47	0.1267
p_F	-2.8007	15.7206	-0.1782	47	0.8594
cubic(p_P, p_C)	-6.1779	28.9445	-0.2134	47	0.8319
cubic(p_P, p_F)	76.4767	54.2524	1.4096	47	0.1652
cubic(p_C, p_F)	-35.1937	38.6398	-0.9108	47	0.367
p_P:p_C	17.7662	43.7928	0.4057	47	0.6868
p_P:p_F	37.3933	47.6736	0.7844	47	0.4368
p_C:p_F	-13.6374	31.325	-0.4354	47	0.6653
p_P:p_C:p_F	89.7344	99.3021	0.9037	47	0.3708
Variables presented in Figure 5:
Cluster 1
Model	AIC
1	119.63
2	100.6
3	97.37
4	96.81
5	99.11
Model 3 favoured by AIC.
Coef.	Estimate	Std. Error	t value	df	p
p_P	-2.9586	2.1631	-1.3677	51	0.1774
p_C	0.1658	0.6819	0.2432	51	0.8088
p_F	-4.9381	1.481	-3.3343	51	0.0016
p_P:p_C	1.5064	4.2455	0.3548	51	0.7242
p_P:p_F	10.9602	5.0161	2.185	51	0.0335
p_C:p_F	11.3893	4.906	2.3215	51	0.0243
Cluster 2
Model	AIC
1	103.07
2	59.75
3	56.69
4	56.73
5	58.52
Model 3 favoured by AIC.
Coef.	Estimate	Std. Error	t value	df	p
p_P	-1.1416	1.5139	-0.7541	51	0.4543
p_C	-1.0366	0.4772	-2.1722	51	0.0345
p_F	-3.2162	1.0365	-3.103	51	0.0031
p_P:p_C	5.7092	2.9712	1.9215	51	0.0603
p_P:p_F	9.3273	3.5106	2.6569	51	0.0105
p_C:p_F	4.7957	3.4335	1.3967	51	0.1685
Cluster 3
Model	AIC
1	97.52
2	50.4
3	19.4
4	21.89
5	21.35
Model 3 favoured by AIC.
Coef.	Estimate	Std. Error	t value	df	p
p_P	3.7507	1.0915	3.4363	51	0.0012
p_C	1.0122	0.3441	2.9417	51	0.0049
p_F	4.4863	0.7473	6.0032	51	0
p_P:p_C	-8.8225	2.1422	-4.1184	51	0.0001
p_P:p_F	-16.5157	2.5311	-6.5251	51	0
p_C:p_F	-6.7519	2.4756	-2.7274	51	0.0087
Cluster 4
Model	AIC
1	118.48
2	90.91
3	73.66
4	68.23
5	75.27
Model 4 favoured by AIC.
Coef.	Estimate	Std. Error	t value	df	p
p_P	11.9705	11.5178	1.0393	47	0.304
p_C	1.1145	1.8033	0.6181	47	0.5395
p_F	-9.0594	7.6027	-1.1916	47	0.2394
cubic(p_P, p_C)	8.6913	13.9979	0.6209	47	0.5377
cubic(p_P, p_F)	-54.7159	26.2371	-2.0854	47	0.0425
cubic(p_C, p_F)	-22.3597	18.6866	-1.1966	47	0.2375
p_P:p_C	-9.1275	21.1787	-0.431	47	0.6685
p_P:p_F	-1.053	23.0555	-0.0457	47	0.9638
p_C:p_F	21.3864	15.1491	1.4117	47	0.1646
p_P:p_C:p_F	-84.9741	48.0237	-1.7694	47	0.0833
Cluster 5
Model	AIC
1	127.81
2	105.38
3	92.04
4	87
5	93.58
Model 4 favoured by AIC.
Coef.	Estimate	Std. Error	t value	df	p
p_P	-21.2927	13.5794	-1.568	47	0.1236
p_C	-0.983	2.1261	-0.4623	47	0.646
p_F	11.1674	8.9635	1.2459	47	0.219
cubic(p_P, p_C)	-0.4309	16.5034	-0.0261	47	0.9793
cubic(p_P, p_F)	76.1475	30.9334	2.4617	47	0.0176
cubic(p_C, p_F)	22.8457	22.0315	1.037	47	0.3051
p_P:p_C	24.6102	24.9696	0.9856	47	0.3294
p_P:p_F	13.4663	27.1823	0.4954	47	0.6226
p_C:p_F	-26.3146	17.8607	-1.4733	47	0.1473
p_P:p_C:p_F	84.596	56.6197	1.4941	47	0.1418
Variables presented in Figure 6:
Bbs1
Model	AIC
1	253.62
2	237.7
3	232.22
4	229.74
5	233.81
Model 4 favoured by AIC.
Coef.	Estimate	Std. Error	t value	df	p
p_P	50.3815	47.4958	1.0608	47	0.2942
p_C	7.8985	7.4362	1.0622	47	0.2936
p_F	-7.2619	31.3511	-0.2316	47	0.8178
cubic(p_P, p_C)	22.4612	57.7228	0.3891	47	0.6989
cubic(p_P, p_F)	-194.571	108.193	-1.7984	47	0.0785
cubic(p_C, p_F)	-14.9222	77.0578	-0.1936	47	0.8473
p_P:p_C	-25.8503	87.3343	-0.296	47	0.7685
p_P:p_F	-32.8793	95.0736	-0.3458	47	0.731
p_C:p_F	52.9987	62.4702	0.8484	47	0.4005
p_P:p_C:p_F	-242.327	198.034	-1.2237	47	0.2272
Bbs2
Model	AIC
1	285.63
2	274.04
3	252.82
4	248.96
5	254.49
Model 4 favoured by AIC.
Coef.	Estimate	Std. Error	t value	df	p
p_P	122.722	56.2188	2.1829	47	0.0341
p_C	12.0911	8.8019	1.3737	47	0.1761
p_F	-6.2731	37.109	-0.169	47	0.8665
cubic(p_P, p_C)	-27.5827	68.3242	-0.4037	47	0.6883
cubic(p_P, p_F)	-316.764	128.064	-2.4735	47	0.0171
cubic(p_C, p_F)	-29.4456	91.2102	-0.3228	47	0.7483
p_P:p_C	-130.871	103.374	-1.266	47	0.2118
p_P:p_F	-156.596	112.535	-1.3915	47	0.1706
p_C:p_F	57.8436	73.9434	0.7823	47	0.438
p_P:p_C:p_F	-212.002	234.405	-0.9044	47	0.3704
Arl6
Model	AIC
1	171.21
2	160
3	162.44
4	156.27
5	159.11
Model 4 favoured by AIC.
Coef.	Estimate	Std. Error	t value	df	p
p_P	-1.5049	24.9341	-0.0604	47	0.9521
p_C	12.0584	3.9038	3.0889	47	0.0034
p_F	-31.1502	16.4586	-1.8926	47	0.0646
cubic(p_P, p_C)	21.8046	30.3031	0.7195	47	0.4754
cubic(p_P, p_F)	-64.9638	56.7989	-1.1438	47	0.2585
cubic(p_C, p_F)	-85.2785	40.4535	-2.1081	47	0.0404
p_P:p_C	43.9476	45.8484	0.9585	47	0.3427
p_P:p_F	123.302	49.9114	2.4704	47	0.0172
p_C:p_F	90.0699	32.7953	2.7464	47	0.0085
p_P:p_C:p_F	-345.882	103.963	-3.327	47	0.0017
Bbs9
Model	AIC
1	200.72
2	187.68
3	181.43
4	178.77
5	182.96
Model 4 favoured by AIC.
Coef.	Estimate	Std. Error	t value	df	p
p_P	65.7714	30.3732	2.1654	47	0.0355
p_C	4.2784	4.7554	0.8997	47	0.3729
p_F	8.6576	20.0488	0.4318	47	0.6678
cubic(p_P, p_C)	-24.2594	36.9133	-0.6572	47	0.5143
cubic(p_P, p_F)	-148.112	69.1888	-2.1407	47	0.0375
cubic(p_C, p_F)	24.3154	49.2779	0.4934	47	0.624
p_P:p_C	-73.0275	55.8496	-1.3076	47	0.1974
p_P:p_F	-90.7115	60.7989	-1.492	47	0.1424
p_C:p_F	14.881	39.9492	0.3725	47	0.7112
p_P:p_C:p_F	-61.9425	126.641	-0.4891	47	0.627
Bbs10
Model	AIC
1	152.24
2	143.37
3	124.1
4	123.94
5	126.05
Model 3 favoured by AIC.
Coef.	Estimate	Std. Error	t value	df	p
p_P	10.039	2.7347	3.6709	51	0.0006
p_C	5.0742	0.8621	5.8861	51	0
p_F	13.907	1.8724	7.4275	51	0
p_P:p_C	-4.3996	5.3673	-0.8197	51	0.4162
p_P:p_F	-28.5359	6.3415	-4.4998	51	0
p_C:p_F	-19.6802	6.2024	-3.173	51	0.0026
Bbs12
Model	AIC
1	118.61
2	105.31
3	91.48
4	79.83
5	93.46
Model 4 favoured by AIC.
Coef.	Estimate	Std. Error	t value	df	p
p_P	15.616	12.7521	1.2246	47	0.2268
p_C	5.5171	1.9965	2.7634	47	0.0081
p_F	-11.959	8.4174	-1.4207	47	0.162
cubic(p_P, p_C)	15.8601	15.498	1.0234	47	0.3114
cubic(p_P, p_F)	-70.8059	29.0488	-2.4375	47	0.0186
cubic(p_C, p_F)	-34.8777	20.6892	-1.6858	47	0.0985
p_P:p_C	-8.847	23.4483	-0.3773	47	0.7077
p_P:p_F	3.6427	25.5263	0.1427	47	0.8871
p_C:p_F	30.2918	16.7726	1.806	47	0.0773
p_P:p_C:p_F	-97.433	53.1701	-1.8325	47	0.0732
Mks1
Model	AIC
1	203.73
2	195.07
3	183.55
4	184.06
5	185.49
Model 3 favoured by AIC.
Coef.	Estimate	Std. Error	t value	df	p
p_P	17.5561	4.6064	3.8112	51	0.0004
p_C	12.3798	1.4521	8.5255	51	0
p_F	23.8964	3.1538	7.5769	51	0
p_P:p_C	-11.6055	9.0408	-1.2837	51	0.2051
p_P:p_F	-37.2149	10.6819	-3.4839	51	0.001
p_C:p_F	-31.5571	10.4474	-3.0206	51	0.0039
Ift27
Model	AIC
1	268.92
2	260.78
3	259.19
4	259.46
5	261.18
Model 2 favoured by AIC.
Coef.	Estimate	Std. Error	t value	df	p
p_P	21.9068	1.6567	13.2228	54	0
p_C	15.8416	1.0461	15.1438	54	0
p_F	21.8778	1.2577	17.3945	54	0
Ift74
Model	AIC
1	240.01
2	234.02
3	229.54
4	221.53
5	229.53
Model 4 favoured by AIC.
Coef.	Estimate	Std. Error	t value	df	p
p_P	21.3584	44.1986	0.4832	47	0.6312
p_C	9.7198	6.9199	1.4046	47	0.1667
p_F	-25.7218	29.1747	-0.8816	47	0.3825
cubic(p_P, p_C)	61.1869	53.7157	1.1391	47	0.2604
cubic(p_P, p_F)	-172.432	100.683	-1.7126	47	0.0934
cubic(p_C, p_F)	-47.979	71.7084	-0.6691	47	0.5067
p_P:p_C	41.551	81.2715	0.5113	47	0.6116
p_P:p_F	80.2749	88.4735	0.9073	47	0.3689
p_C:p_F	90.8809	58.1334	1.5633	47	0.1247
p_P:p_C:p_F	-462.013	184.287	-2.507	47	0.0157
Variables presented in Supplementary Figure 4:
Igf1
Model	AIC
1	173.26
2	149.5
3	144.02
4	145.1
5	145.82
Model 3 favoured by AIC.
Coef.	Estimate	Std. Error	t value	df	p
p_P	5.9648	3.0516	1.9547	54	0.0558
p_C	1.4805	0.9095	1.6278	54	0.1094
p_F	4.6659	1.9824	2.3536	54	0.0223
p_P:p_C	-7.1305	5.9095	-1.2066	54	0.2328
p_P:p_F	-9.9908	7.0863	-1.4099	54	0.1643
p_C:p_F	-18.6202	6.579	-2.8302	54	0.0065
Variables presented in Supplementary Figure 5:
mAd3
Model	AIC
1	-97.72
2	-103.44
3	-106.07
4	-109.95
5	-104.48
Model 4 favoured by AIC.
Coef.	Estimate	Std. Error	t value	df	p
p_P	5.431	2.5156	2.159	50	0.0357
p_C	-0.3323	0.3743	-0.8878	50	0.3789
p_F	2.1529	1.6445	1.3092	50	0.1965
cubic(p_P, p_C)	-3.5343	3.0552	-1.1568	50	0.2528
cubic(p_P, p_F)	-9.19	5.7757	-1.5911	50	0.1179
cubic(p_C, p_F)	6.4495	3.9977	1.6133	50	0.113
p_P:p_C	-6.2569	4.6247	-1.3529	50	0.1822
p_P:p_F	-11.2914	4.9018	-2.3035	50	0.0254
p_C:p_F	-1.403	3.26	-0.4304	50	0.6688
p_P:p_C:p_F	3.5937	10.3	0.3489	50	0.7286
mAd5
Model	AIC
1	-99.96
2	-104.9
3	-108.76
4	-110.37
5	-107.14
Model 3 favoured by AIC.
Coef.	Estimate	Std. Error	t value	df	p
p_P	-0.4047	0.3713	-1.09	54	0.2806
p_C	0.4908	0.1107	4.4357	54	0
p_F	-0.1045	0.2412	-0.4333	54	0.6665
p_P:p_C	0.921	0.719	1.2811	54	0.2056
p_P:p_F	2.6145	0.8621	3.0325	54	0.0037
p_C:p_F	0.6644	0.8004	0.8301	54	0.4101
mASPC3
Model	AIC
1	-366.18
2	-379.01
3	-384.51
4	-381.53
5	-382.74
Model 3 favoured by AIC.
Coef.	Estimate	Std. Error	t value	df	p
p_P	0.0897	0.0373	2.4048	54	0.0196
p_C	0.0354	0.0111	3.1808	54	0.0024
p_F	0.0155	0.0242	0.6398	54	0.525
p_P:p_C	-0.2371	0.0722	-3.2825	54	0.0018
p_P:p_F	-0.1989	0.0866	-2.2956	54	0.0256
p_C:p_F	-0.0067	0.0804	-0.0838	54	0.9335
mMes3
Model	AIC
1	-316.29
2	-327.58
3	-326.24
4	-330.61
5	-326.42
Model 4 favoured by AIC.
Coef.	Estimate	Std. Error	t value	df	p
p_P	-0.9791	0.4	-2.4477	50	0.0179
p_C	-0.04	0.0595	-0.6721	50	0.5046
p_F	0.5802	0.2615	2.2189	50	0.0311
cubic(p_P, p_C)	1.2632	0.4858	2.6002	50	0.0122
cubic(p_P, p_F)	2.6093	0.9184	2.8411	50	0.0065
cubic(p_C, p_F)	1.1961	0.6357	1.8815	50	0.0657
p_P:p_C	1.6108	0.7354	2.1904	50	0.0332
p_P:p_F	0.6111	0.7795	0.784	50	0.4367
p_C:p_F	-1.1184	0.5184	-2.1575	50	0.0358
p_P:p_C:p_F	1.5718	1.6378	0.9597	50	0.3418
mMac2
Model	AIC
1	-414.33
2	-410.93
3	-412.45
4	-407.95
5	-410.91
Model 1 favoured by AIC.
Coef.	round(summary(model.AIC)$coef[, c(1:3)], 4)	df	p
Estimate	0.0024	57	0.0149
Std. Error	0.001	57	0.0149
t value	2.5072	57	0.0149
